# Supplementary material for: Size dependent effect of new organometallic triptycene tectons on the dimensions of self-assembled macrocycles
Source: Royal Society of Chemistry journal article supplement (doi:10.1039/c4qi00211c), 2015-01-01

## Size Dependent Effect of New Organometallic Triptycene Tectons on the Dimension of Self-Assembled Macrocycles

Sourav Chakraborty,<sup>1</sup> Sourav Bhowmick,<sup>1</sup> Jianqiu Ma,<sup>2</sup> Hongwei Tan,<sup>2</sup> and Neeladri Das<sup>1\*</sup>

<sup>1</sup>*Department of Chemistry, Indian Institute of Technology Patna, Patna 800 013, Bihar, India*

<sup>2</sup>*College of Chemistry, Beijing Normal University, Beijing 100875, People's Republic of China*

*E-mail: neeladri@iitp.ac.in; Tel. +91 612 2552023; Fax +91 612 2277383.*

### Table of contents

|                                                                                |     |
|--------------------------------------------------------------------------------|-----|
| 1. <sup>1</sup> H and <sup>31</sup> P NMR spectra of complex <b>1</b> .....    | S2  |
| 2. <sup>1</sup> H and <sup>31</sup> P NMR spectra of complex <b>2</b> .....    | S3  |
| 3. <sup>1</sup> H and <sup>31</sup> P NMR spectra of complex <b>3</b> .....    | S4  |
| 4. <sup>1</sup> H and <sup>31</sup> P NMR spectra of complex <b>4</b> .....    | S5  |
| 5. ESI-MS data of complex <b>1</b> and <b>2</b> .....                          | S6  |
| 6. ESI-MS data of complex <b>3</b> and <b>4</b> .....                          | S7  |
| 7. <sup>1</sup> H and <sup>31</sup> P NMR spectra of macrocycle <b>5</b> ..... | S8  |
| 8. <sup>1</sup> H and <sup>31</sup> P NMR spectra of macrocycle <b>6</b> ..... | S9  |
| 9. <sup>1</sup> H DOSY NMR spectra of macrocycle <b>5</b> and <b>6</b> .....   | S10 |
| 10. MALDI-TOF-MS data of macrocycle <b>5</b> and <b>6</b> .....                | S11 |

$^1\text{H}$  NMR spectrum of **1**.

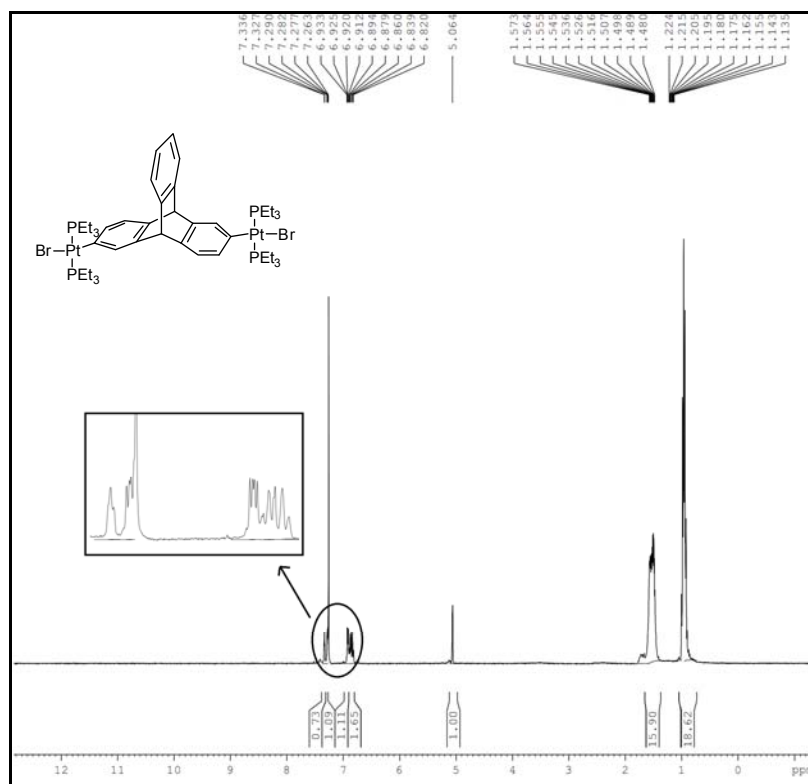

$^{31}\text{P}$  NMR spectrum of **1**.

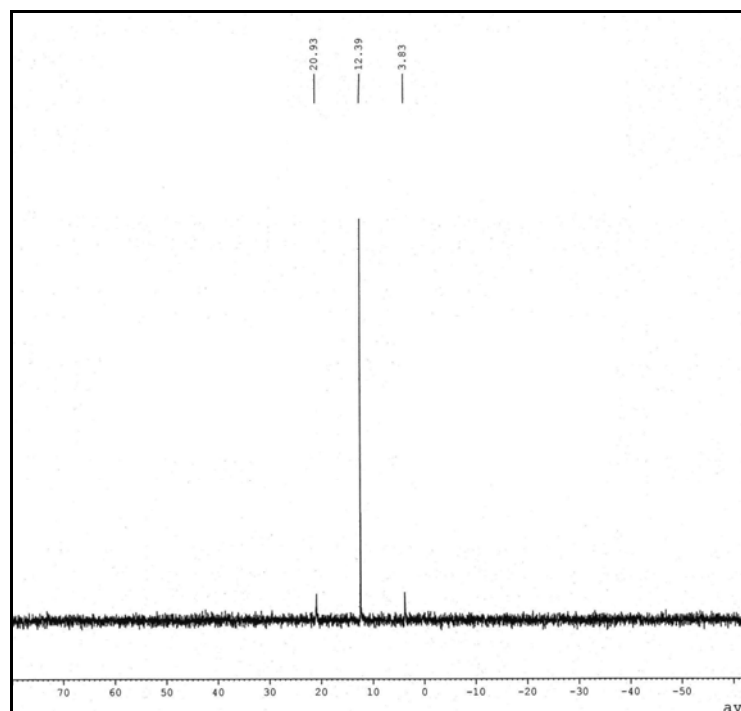

$^1\text{H}$  NMR spectrum of **2**.

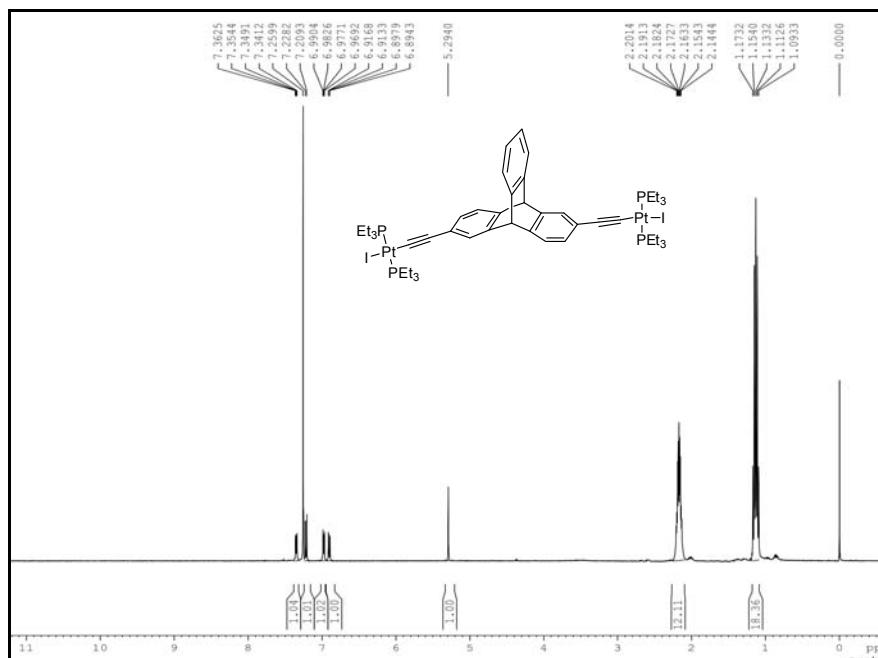

$^{31}\text{P}$  NMR spectrum of **2**.

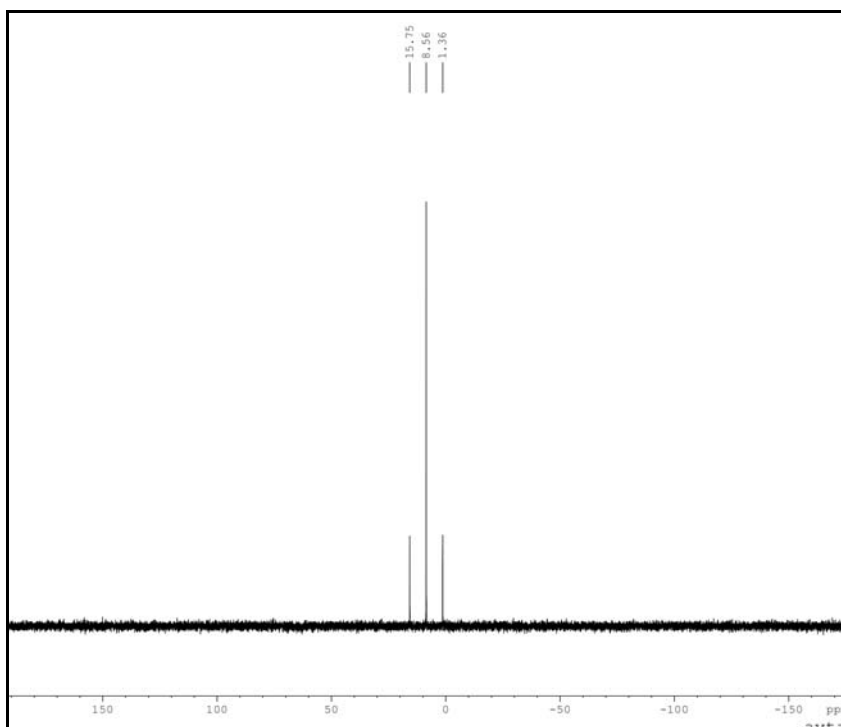

$^1\text{H}$  NMR spectrum of **3**.

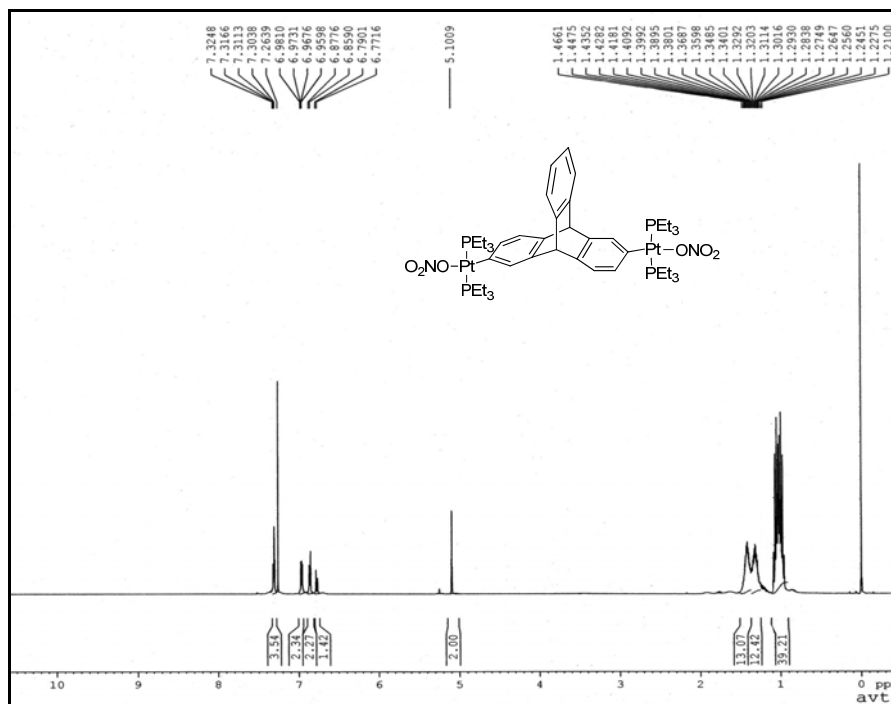

$^{31}\text{P}$  NMR spectrum of **3**.

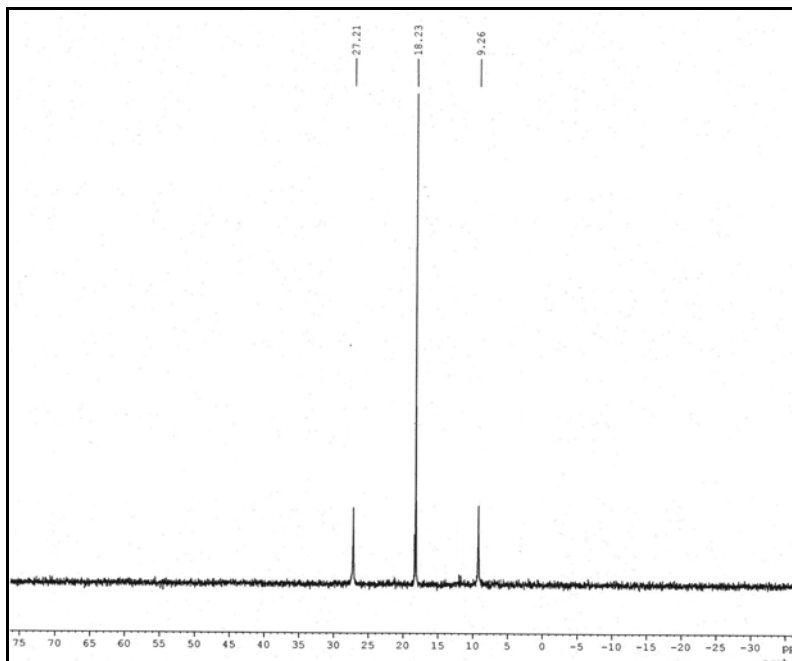

$^1\text{H}$  NMR spectrum of **4**.

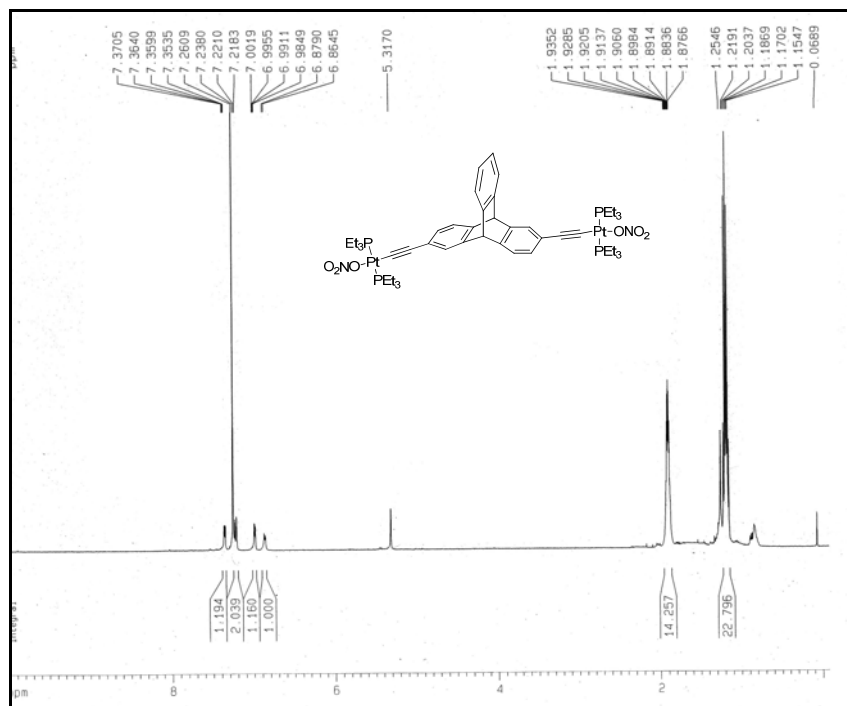

$^{31}\text{P}$  NMR spectrum of **4**.

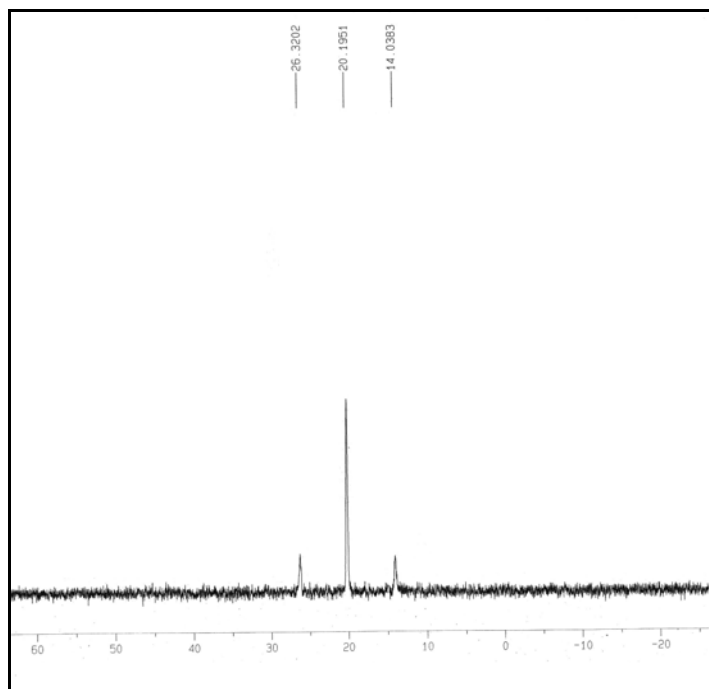

ESI-MS data of 1.

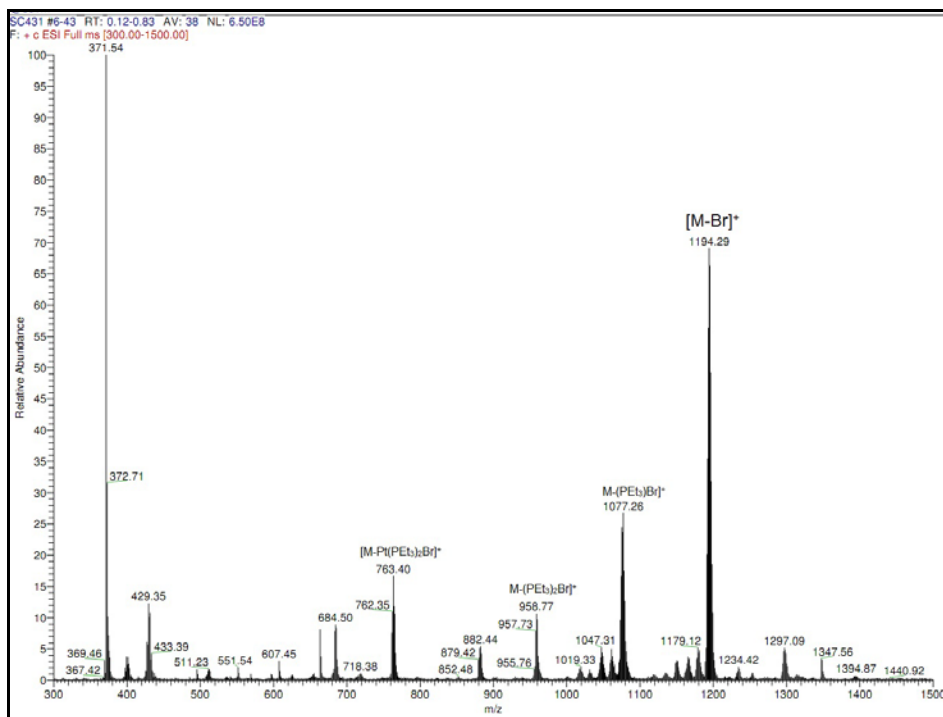

ESI-MS data of 2.

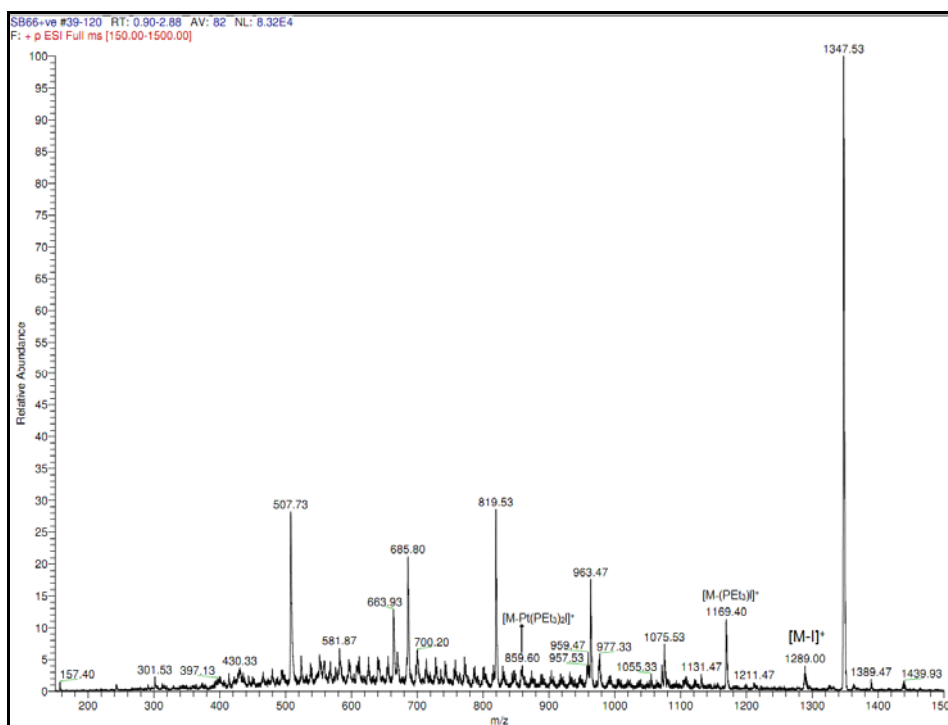

ESI-MS data of 3.

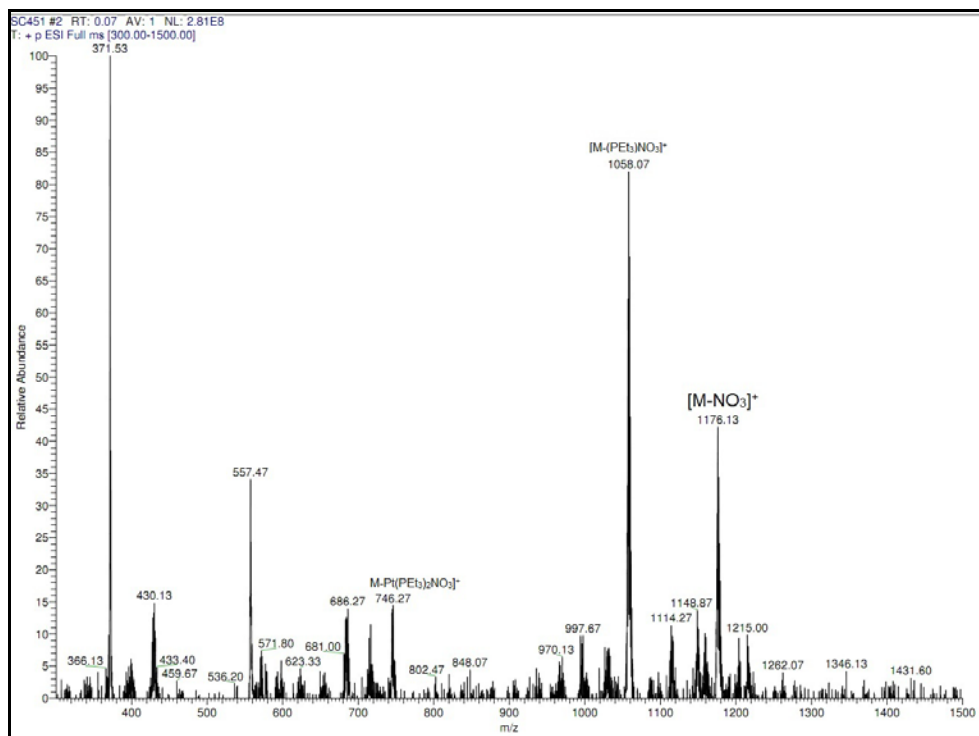

ESI-MS data of 4.

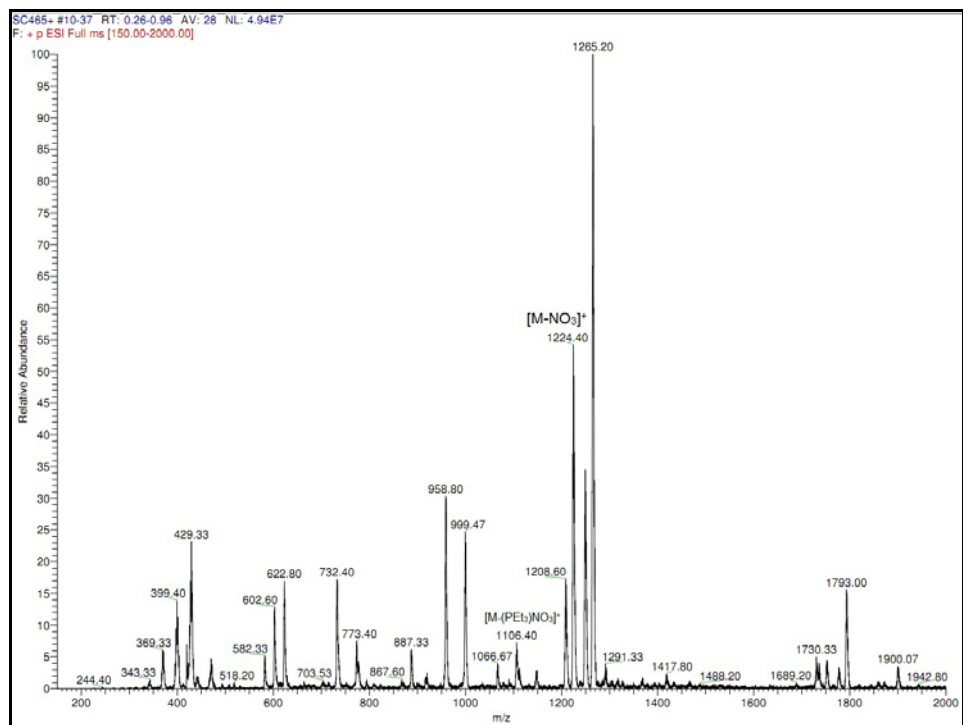

$^1\text{H}$  NMR spectrum of **5**.

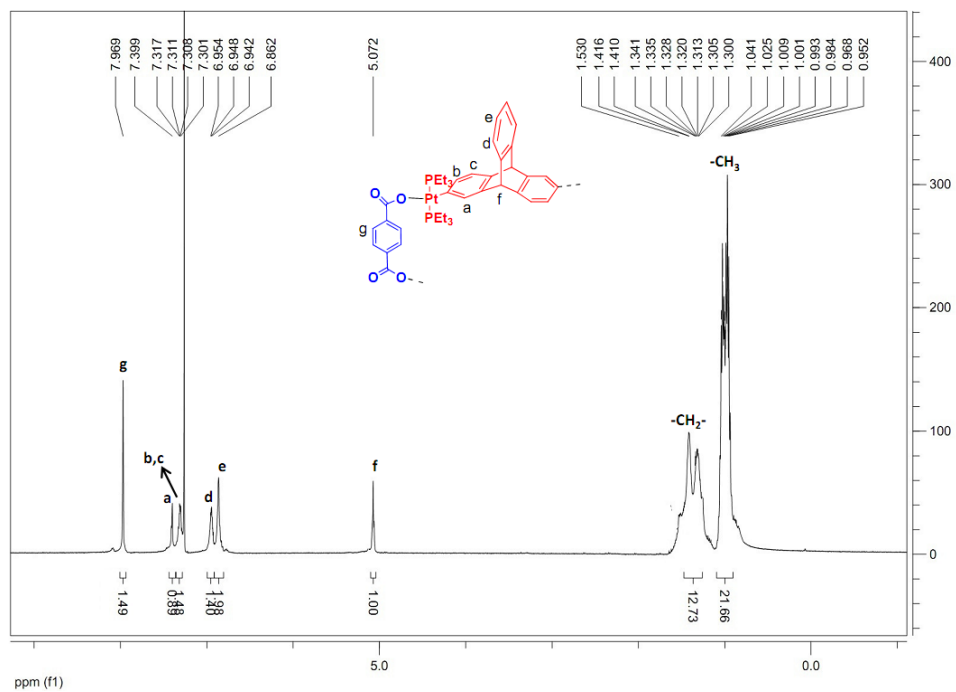

$^{31}\text{P}$  NMR spectrum of **5**.

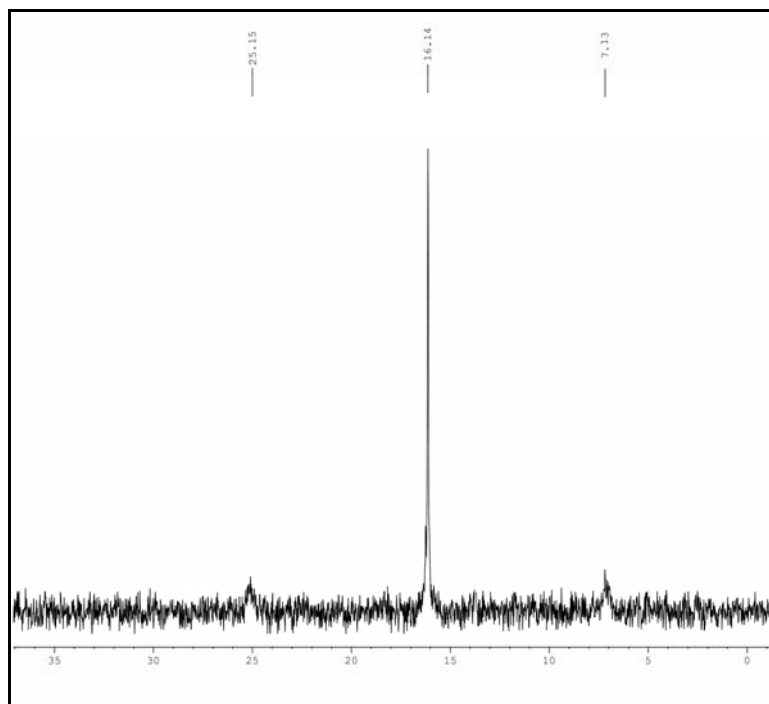



$^1\text{H}$  NMR spectrum of **6**.

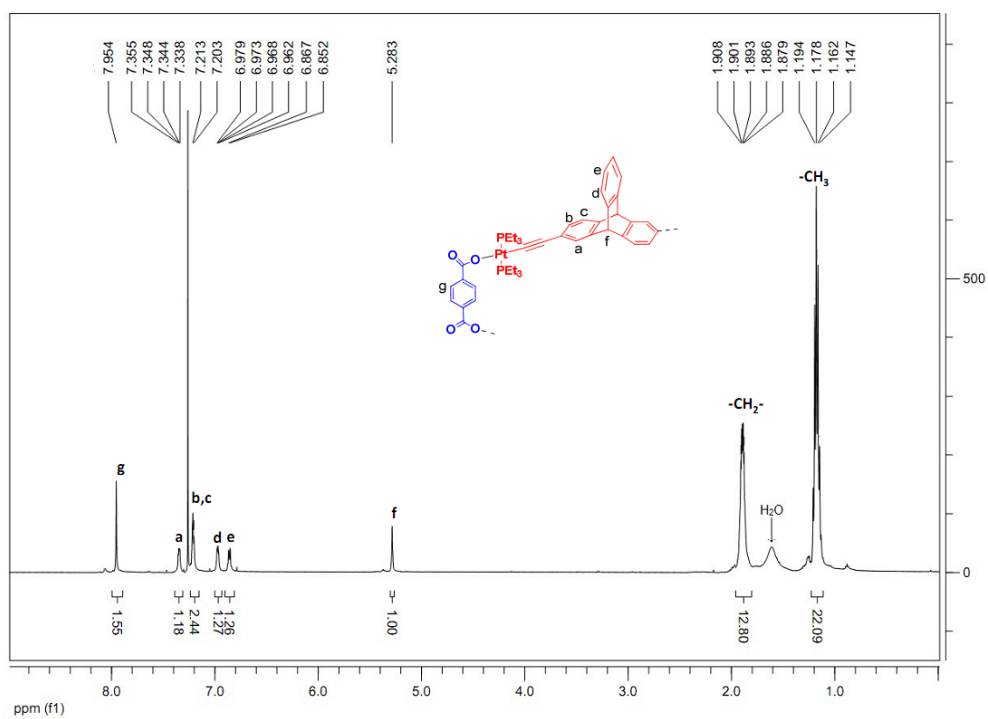

$^{31}\text{P}$  NMR spectrum of **6**.

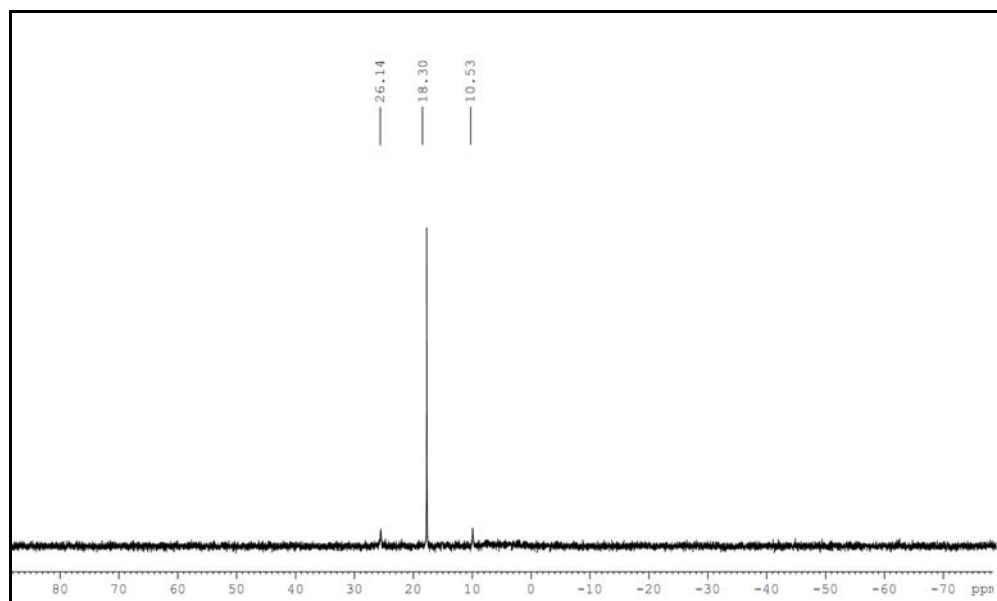

$^1\text{H}$  DOSY NMR spectrum of **5** in  $\text{CDCl}_3$ :

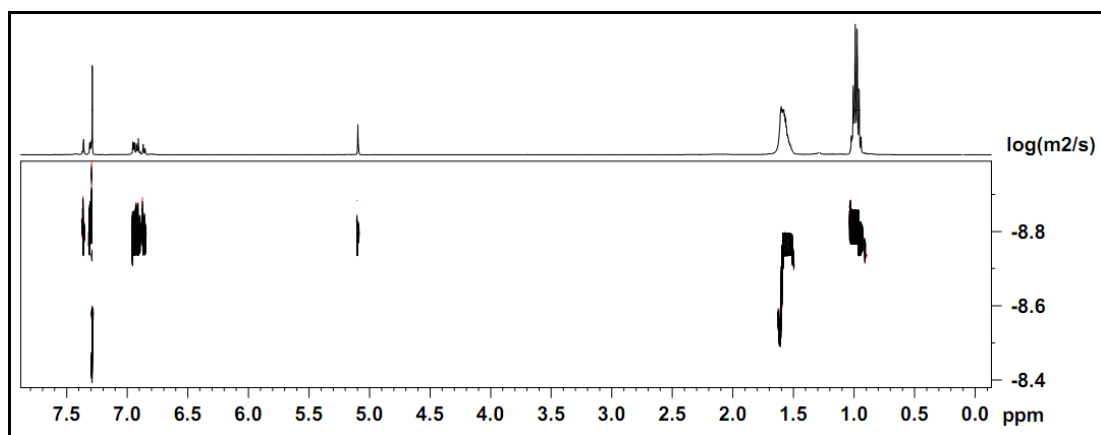

$^1\text{H}$  DOSY NMR spectrum of **6** in  $\text{CDCl}_3$ :

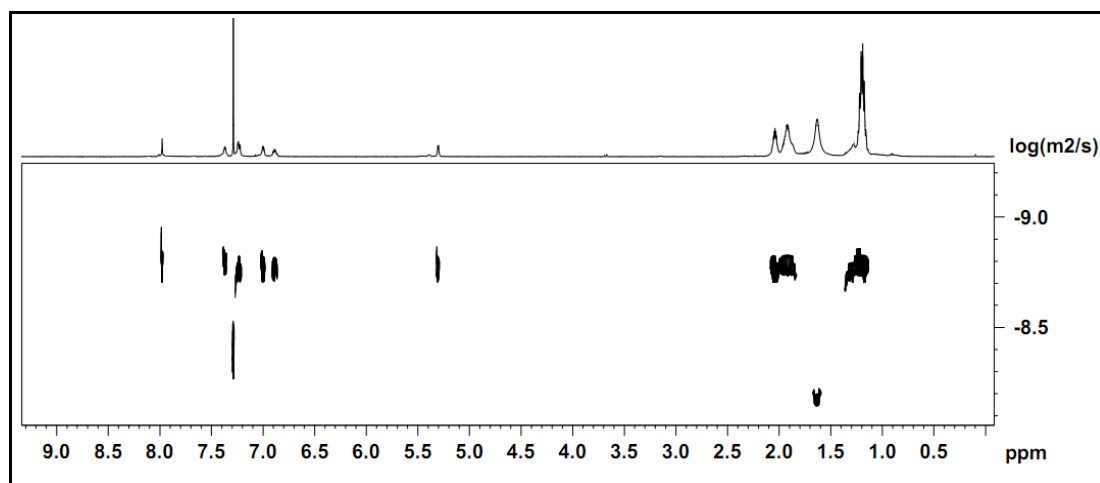

MALDI-TOF-MS data of **5**.

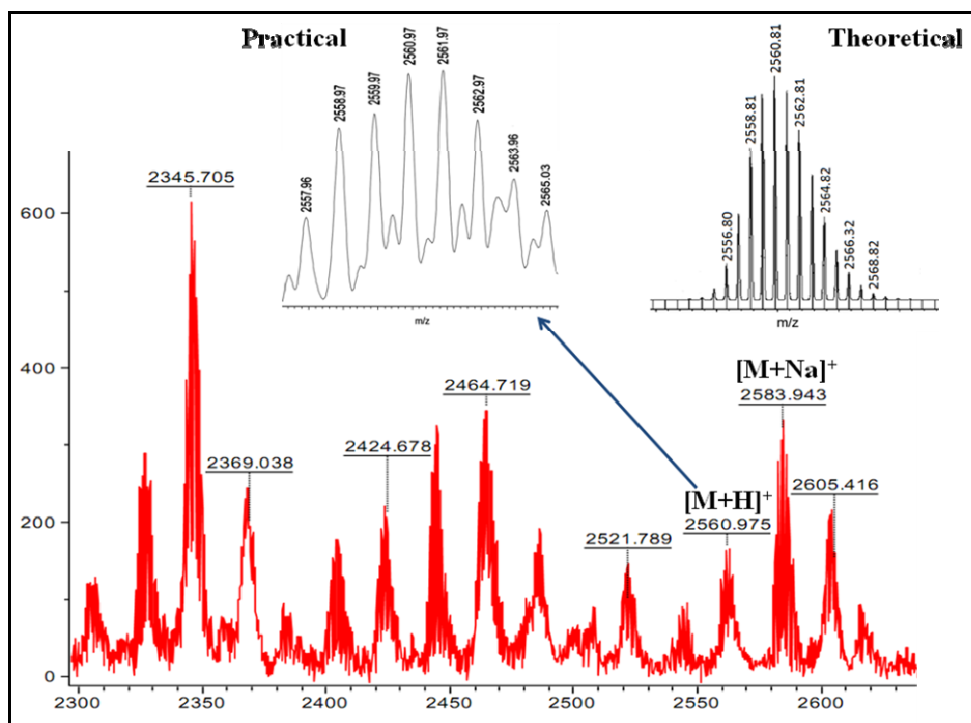

MALDI-TOF-MS data of **6**.

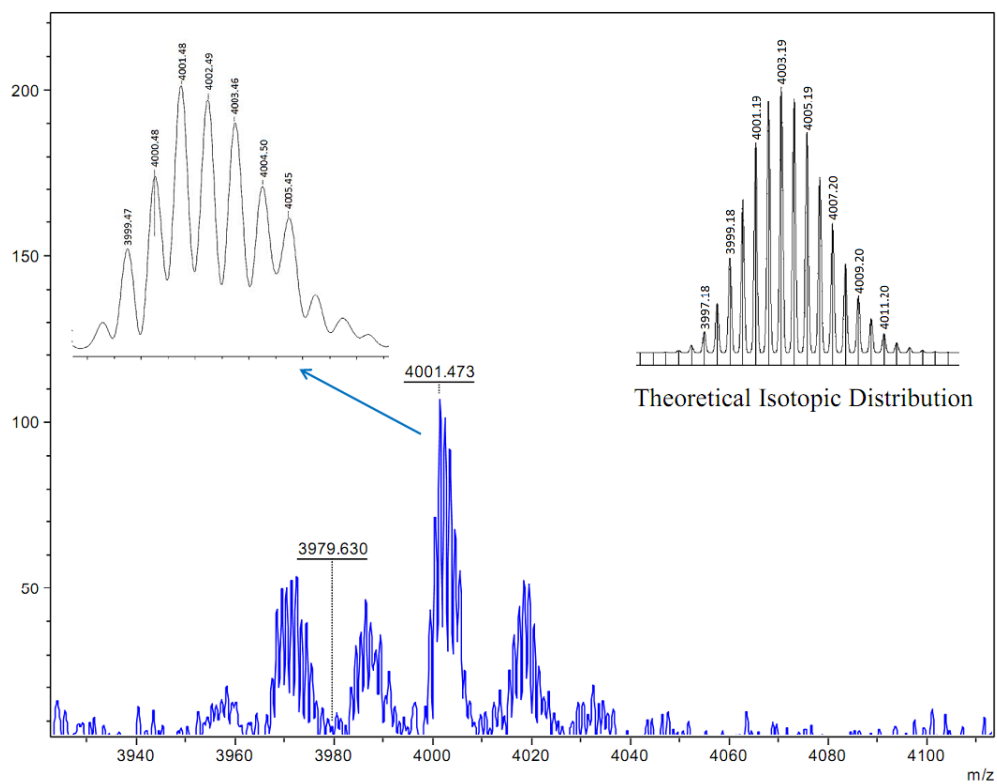

Supplement: c4qi00211c1.pdf [file c4qi00211c1.pdf]
